# Supplementary material for: Hormone-sensitive lipase is localized at synapses and is necessary for normal memory functioning in mice
Source: PubMed Central journal article supplement — J Lipid Res. 2022 Mar 15;63(5):100195. doi: 10.1016/j.jlr.2022.100195 (PMC9026619; doi:10.1016/j.jlr.2022.100195), 2022-03-15

Skoug et al. – Supplementary information

**Table S1.** RT-PCR primers and respective efficiency.

| Protein            | Mouse gene     | Forward primer 5'→3'       | Reverse primer 5'→3'      | Primer efficiency (%) |
|--------------------|----------------|----------------------------|---------------------------|-----------------------|
| ABDH12             | <i>Abdh12</i>  | CGCTGGGCAGACGAAAGAG        | GGAATGGCAATGTAGAACCCC     | 101                   |
| ABDH6              | <i>Abdh6</i>   | CAATCCTGGCATTGTGCGT        | ATGGTGTGCGTAGCGAACTT      | 104                   |
| PNPLA2 (ATGL)      | <i>Pnpla2</i>  | TCCCACCTTAGCTCCAAGGAT      | AGCTTCCTCTGCATCCTCTTC     | 99                    |
| ACACA              | <i>Acaca</i>   | TACTGCCATCCCATGTGC         | GCTTCCAGGAGCAGTCGT        | 98                    |
| CPT1A              | <i>Cpt1a</i>   | CCAAAACAGTATCCCAATCATCTG   | AAGAGACCCCGTAGCCATCA      | 100                   |
| COX1               | <i>Cox1</i>    | GTGCTGGGGCAGTGCTGGAG       | TGGGGCCTGAGTAGCCCGTG      | 102                   |
| COX2               | <i>Cox2</i>    | CCACTTCAAGGGAGTCT          | AGTCATCTGCTACGGGAGGA      | 105                   |
| DAGL $\alpha$      | <i>Dagla</i>   | GTCCTGCCAGCTTATCTTCCTC     | CGTGTGGGTTATAGACCAAGC     | 99                    |
| FASN               | <i>Fasn</i>    | TTCCAAGACGAAAATGATGC       | AATTGTGGGATCAGGAGAGC      | 106                   |
| FAAH               | <i>Faah</i>    | GCTGTGCTCTTTACCTACCTG      | GAAGCATTCTTGAGGCTCAC      | 99                    |
| SLC2A1 (GLUT1)     | <i>Slc2a1</i>  | CTTCATTGTGGGCATGTGCTTC     | AGGTTCCGGCCTTTGGTCTCAG    | 101                   |
| SLC2A3 (GLUT3)     | <i>Slc2a3</i>  | ATGGGGACAACGAAGGTGAC       | GTCTCAGGTGCATTGATGACTC    | 96                    |
| SLC2A4 (GLUT4)     | <i>Slc2a4</i>  | ACTCTTGCCACACAGGCTCT       | AATGGAGACTGATGCGCTCT      | 105                   |
| GLUL               | <i>Glul</i>    | GCTGCAAGACCCGTACCCT        | TTCCACTCAGGTAACTCTCCACA   | 104                   |
| GPM                | <i>Pygm</i>    | CTTAGCCGGAGTGGAAAATGT      | GTAATCTCTCGGAGTAGCCACA    | 98                    |
| GPB                | <i>Pygb</i>    | CTTAGCCGGAGTGGAAAATGT      | GTAATCTCTCGGAGTAGCCACA    | 97                    |
| HK1                | <i>Hk1</i>     | TATCGGTCCAGCACGTATGC       | AGAACCGTCTACGCCAACTG      | 100                   |
| IL-10              | <i>Il10</i>    | ATGGTGTCTTTCAATTGCTC       | AGGATCTCCCTGGTTTCTCTT     | 100                   |
| IL-6               | <i>Il6</i>     | TCTGAAGGACTCTGGCTTTG       | GATGGATGCTACCAAAGTGA      | 101                   |
| IL-1 $\beta$       | <i>Il1B</i>    | GAAGAGCCCATCCTCTGTGA       | TTCATCTCGGAGCCTGTAGTG     | 103                   |
| LPL                | <i>Lpl</i>     | AGGTGGACATCGGAGAACTG       | TTTGTCCAGTGTCAGCCAGA      | 99                    |
| MAGL               | <i>Magl</i>    | GTGCCTACCTGCTCATGGAAT      | GAGGACGGAGTTGGTCACTTC     | 97                    |
| PGC1 $\alpha$ -1 * | <i>Pparg1a</i> | GGACATGTGCAGCCAAGACTCT     | CACTTCAATCCACCCAGAAAGCT   | 100                   |
| PGC1 $\alpha$ -4 * | <i>Pparg1a</i> | TCACACCAAACCCACAGAAA       | CTGGAAGATATGGCACAT        | 97                    |
| PGC1 $\alpha$      | <i>Pparg1a</i> | TGATGTGAATGACTTGGATACAGACA | GCTCATTGTTGACTGGTTGGATATG | 99                    |
| NF- $\kappa$ B     | <i>Nfkb1</i>   | CGGAGGACGGAGACTCGTT        | CCATGGTCAGCGGCTTCT        | 101                   |
| PPAR $\gamma$      | <i>Pparg</i>   | GGTCAGCTCTTGTGAATGGAA      | ATCAGCTCTGTGGACCTCTCC     | 98                    |
| TNF- $\alpha$      | <i>Tnf</i>     | TTGACCTCAGCGCTGAGTTG       | CCTGTAGCCCACGTCGTAGC      | 104                   |

\*result from alternative splicing of *Pparg1a*

**Table S2.** Oxylipins detected in the lipidomics analysis, their retention times and multiple reaction monitoring transitions, mean concentrations (pg/mg of tissue) in cortex and hippocampus, and concentration change (%) for HSL<sup>-/-</sup> versus HSL<sup>+/+</sup> mice.

| Name                                           | Abbreviation         | Retention time (min) | Precursor > Product | Mean concentration in hippocampus |                    |          | Mean concentration in cortex |                    |          |
|------------------------------------------------|----------------------|----------------------|---------------------|-----------------------------------|--------------------|----------|------------------------------|--------------------|----------|
|                                                |                      |                      |                     | HSL <sup>+/+</sup>                | HSL <sup>-/-</sup> | % change | HSL <sup>+/+</sup>           | HSL <sup>-/-</sup> | % change |
| 6-keto-prostaglandin F1 $\alpha$               | 6-keto-PGF1 $\alpha$ | 6                    | 369 > 163           | 1.69                              | 1.24               | -27%     | 1.35                         | 1.45               | 8%       |
| Thromboxane B2                                 | TxB2                 | 7.8                  | 369.23 > 169.1      | 14.78                             | 15.04              | 2%       | 38.86                        | 40.48              | 4%       |
| 9,10,13-Trihydroxy-11-octadecenoic acid        | 9,10,13-TriHOME      | 8.2                  | 329.23 > 171        | 6.07                              | 5.73               | -6%      | 3.83                         | 4.22               | 10%      |
| 9,12,13-Trihydroxy-10-octadecenoic acid        | 9,12,13-TriHOME      | 8.4                  | 329.23 > 211.1      | 6.21                              | 5.83               | -6%      | 3.96                         | 4.29               | 8%       |
| Prostaglandin E2                               | PGE2                 | 8.4                  | 351.21 > 315.1      | 23.62                             | 19.85              | -16%     | 29.45                        | 30.55              | 4%       |
| Prostaglandin F2 $\alpha$                      | PGF2 $\alpha$        | 8.6                  | 353.23 > 193.3      | 32.76                             | 34.56              | 5%       | 76.67                        | 93.01              | 21%      |
| 8-iso Prostaglandin E2                         | 8-iso-PGE2           | 9.05                 | 351.21 > 271.1      | 74.73                             | 64.29              | -14%     | 156.32                       | 141.66             | -9%      |
| Prostaglandin D2                               | PGD2                 | 9.35                 | 351.21 > 315.2      | 77.17                             | 65.02              | -16%     | 157.21                       | 138.78             | -12%     |
| 5(s)6(R) lipoxin A4                            | 5(s)6(R)-LXA4        | 10                   | 351 > 115           | 0.21                              | 0.21               | 1%       | 0.14                         | 0.15               | 9%       |
| Trans-Leukotriene B4                           | trans-LTB4           | 12.4                 | 335.22 > 195.1      | 0.14                              | 0.15               | 6%       | 0.16                         | 0.14               | -10%     |
| Leukotriene B4                                 | LTB4                 | 13.06                | 335.22 > 195.1      | 0.21                              | 0.23               | 11%      | 0.13                         | 0.14               | 9%       |
| 12,13-Dihydroxyoctadec-9(Z)-enoic acid         | 12,13-DiHOME         | 13.6                 | 313.24 > 183.2      | 1.58                              | 1.42               | -10%     | 1.50                         | 1.41               | -6%      |
| 9,10-Dihydroxyoctadec-12(Z)-enoic acid         | 9,10-DiHOME          | 13.89                | 313.24 > 201        | 0.76                              | 0.70               | -8%      | 0.66                         | 0.64               | -2%      |
| 11,12-dihydroxyeicosatrienoic acid             | 11,12-DiHETrE        | 14.6                 | 337.24 > 167.1      | 0.25                              | 0.23               | -9%      | 0.28                         | 0.28               | -1%      |
| 14,15-Dihydroxyeicosatrienoic acid             | 14,15-DiHETrE        | 14.6                 | 337.24 > 207        | 0.57                              | 0.51               | -10%     | 0.65                         | 0.64               | -2%      |
| 8,9-Dihydroxyeicosatrienoic acid               | 8,9-DiHETrE          | 15.6                 | 337.24 > 127.2      | 0.34                              | 0.32               | -5%      | 0.33                         | 0.32               | -4%      |
| 20-Hydroxyarachidonic acid                     | 20-HETE              | 16                   | 319.23 > 289.2      | 0.75                              | 0.62               | -18%     | 1.90                         | 1.51               | -20%     |
| 5,6-dihydroxy-8Z,11Z,14Z-icosatrienoic acid    | 5,6-DiHETrE          | 16.21                | 337.24 > 71         | 0.94                              | 0.82               | -13%     | 0.86                         | 0.87               | 1%       |
| (12S)-12-hydroxyeicosapentaenoic acid          | 12(S)-HEPE           | 16.3                 | 317.21 > 179.1      | 0.25                              | 0.22               | -12%     | 0.41                         | 0.60               | 48%      |
| 13-hydroxy-cis-9,trans-11-octadecadienoic acid | 13-HODE              | 17                   | 295.23 > 195.1      | 37.36                             | 23.01              | -38%     | 18.37                        | 8.94               | -51%     |
| 13-Oxo-9Z,11E-octadecadienoic acid             | 13-oxo-ODE           | 17                   | 293.21 > 113.1      | 13.09                             | 5.85               | -55%     | 12.51                        | 5.68               | -55%     |
| 9(S)-hydroxyoctadecadienoic acid               | 9(S)-HODE            | 17                   | 295.23 > 171.2      | 15.24                             | 8.49               | -44%     | 14.56                        | 8.36               | -43%     |
| 17-hydroxydocosahexaenoic acid                 | 17-HDOHE             | 17.48                | 343.23 > 281.2      | 24.14                             | 15.42              | -36%     | 20.86                        | 10.72              | -49%     |
| 15-ketoeicosatetraenoic acid                   | 15-oxo-ETE           | 17.6                 | 317.21 > 113.2      | 435.76                            | 296.70             | -32%     | 261.06                       | 187.52             | -28%     |
| 15-hydroxy-5Z,8Z,11Z,13E-icosatetraenoic acid  | 15-HETE              | 17.7                 | 319.23 > 219        | 15.50                             | 14.69              | -5%      | 18.27                        | 17.93              | -2%      |
| 11-hydroxy-5Z,8Z,11E,14Z-icosatetraenoic acid  | (+)-11-HETE          | 17.9                 | 319.23 > 167.2      | 12.77                             | 10.36              | -19%     | 21.26                        | 19.59              | -8%      |

|                                               |              |       |                |        |        |      |        |        |      |
|-----------------------------------------------|--------------|-------|----------------|--------|--------|------|--------|--------|------|
| 12-Hydroxy-5,8,10,14-eicosatetraenoic acid    | 12-HETE      | 18    | 319.23 > 179.1 | 90.67  | 75.08  | -17% | 72.84  | 86.28  | 18%  |
| 15(S)-Hydroxyeicosatrienoic acid              | 15(S)-HETrE  | 18.13 | 321.24 > 303.3 | 1.92   | 1.12   | -42% | 2.20   | 1.42   | -35% |
| 8(S)-hydroxyeicosatetraenoic acid             | 8(S)-HETE    | 18.27 | 319.23 > 155   | 14.94  | 14.72  | -1%  | 7.62   | 8.85   | 16%  |
| 5-Hydroxyeicosatetraenoic acid                | 5-HETE       | 18.3  | 319.23 > 115.1 | 47.29  | 47.51  | 0%   | 28.96  | 33.31  | 15%  |
| 9-hydroxy-5Z,7E,11Z,14Z-eicosatetraenoic acid | (+/-)9-HETE  | 18.5  | 319.23 > 167.2 | 418.82 | 279.08 | -33% | 258.39 | 180.12 | -30% |
| 12-oxo-5Z,8Z,10E,14Z-eicosatetraenoic acid    | 12-OxoETE    | 18.5  | 317.21 > 273.1 | 15.07  | 16.01  | 6%   | 8.20   | 11.09  | 35%  |
| 9,10-Epoxyoctadecenoic acid                   | 9,10-EpOME   | 18.9  | 295.23 > 171.2 | 0.07   | 0.07   | -9%  | 0.07   | 0.07   | 5%   |
| 14,15-epoxyeicosatrienoic acid                | 14,15-EpETrE | 19.06 | 319.23 > 219   | 21.73  | 21.18  | -3%  | 8.43   | 11.32  | 34%  |
| 5-ketoeicosatetraenoic acid                   | 5-oxo-ETE    | 19.1  | 317.21 > 203.2 | 19.99  | 21.35  | 7%   | 14.50  | 16.11  | 11%  |
| 11,12-epoxyeicosatrienoic acid                | 11,12-EpETrE | 19.4  | 319.23 > 167.1 | 10.34  | 8.62   | -17% | 3.48   | 4.19   | 20%  |
| 5,6-epoxyeicosatrienoic acid                  | 5,6-EpETrE   | 19.4  | 319.23 > 191.1 | 9.59   | 9.11   | -5%  | 4.36   | 5.48   | 26%  |
| 8,9-epoxyeicosatrienoic acid                  | 8,9-EpETrE   | 19.4  | 319.23 > 69.2  | 679.39 | 541.97 | -20% | 245.07 | 248.88 | 2%   |

**Table S3.** Endocannabinoids detected in the lipidomics analysis, their retention times and multiple reaction monitoring transitions, mean concentrations (pg/mg of tissue) in cortex and hippocampus, and concentration change (%) for HSL<sup>-/-</sup> versus HSL<sup>+/+</sup> mice.

| Name                                   | Abbreviation     | Retention time (min) | Precursor > Product | Mean concentration in hippocampus |                    |          | Mean concentration in cortex |                    |          |
|----------------------------------------|------------------|----------------------|---------------------|-----------------------------------|--------------------|----------|------------------------------|--------------------|----------|
|                                        |                  |                      |                     | HSL <sup>+/+</sup>                | HSL <sup>-/-</sup> | % change | HSL <sup>+/+</sup>           | HSL <sup>-/-</sup> | % change |
| Prostaglandin F2 $\alpha$ ethanolamide | PGF2 $\alpha$ EA | 3.19                 | 380 > 62            | 0.15                              | 0.14               | -4%      | 0.09                         | 0.09               | 2%       |
| Prostaglandin E2 ethanolamide          | PGE2 EA          | 3.24                 | 378 > 62            | 1.15                              | 1.07               | -7%      | 0.66                         | 0.50               | -24%     |
| Eicosapentaenoylethanolamide           | EPEA             | 5.66                 | 346 > 62            | 0.02                              | 0.01               | -22%     | 0.02                         | 0.02               | 0%       |
| Palmitoleoylethanolamide               | POEA             | 6.27                 | 298 > 62            | 1.03                              | 1.21               | 18%      | 4.03                         | 3.43               | -15%     |
| Docosahexaenoylethanolamide            | DHEA             | 6.31                 | 372 > 62            | 2.62                              | 2.69               | 3%       | 10.35                        | 7.66               | -26%     |
| Arachidonylethanolamide (anandamide)   | AEA              | 6.58                 | 348 > 62            | 3.46                              | 3.12               | -10%     | 9.26                         | 8.67               | -6%      |
| N-Arachidonoylglycine                  | NAGly            | 6.66                 | 362 > 287           | 11.76                             | 9.12               | -22%     | 12.42                        | 11.94              | -4%      |
| Linoleoylethanolamide                  | LEA              | 6.72                 | 324 > 62            | 1.81                              | 1.70               | -6%      | 8.37                         | 7.09               | -15%     |
| 2-Arachidonoylglycerol                 | 2-AG             | 7.3                  | 379 > 287           | 2912.07                           | 2508.09            | -14%     | 2097.79                      | 2191.85            | 4%       |
| 2-Linoleoylglycerol                    | 2-LG             | 7.63                 | 355 > 263           | 96.67                             | 84.02              | -13%     | 119.71                       | 95.20              | -20%     |
| Docosatetraenoylethanolamide           | DEA              | 8.21                 | 376 > 62            | 0.28                              | 0.30               | 7%       | 0.91                         | 0.92               | 1%       |
| N-Oleoylethanolamine                   | OEA              | 8.52                 | 326 > 62            | 10.51                             | 9.64               | -8%      | 21.00                        | 22.92              | 9%       |
| Stearoylethanolamide                   | SEA              | 11.85                | 328 > 62            | 18.25                             | 16.96              | -7%      | 10.97                        | 11.34              | 3%       |

**Figure S1.** Tukey plots showing relative expression of genes coding for metabolism proteins or cytokines in the hippocampus and cortex of HSL<sup>-/-</sup> mice relative to wild-type littermates. \*P<0.05, \*\*P<0.01 in Student t-tests.

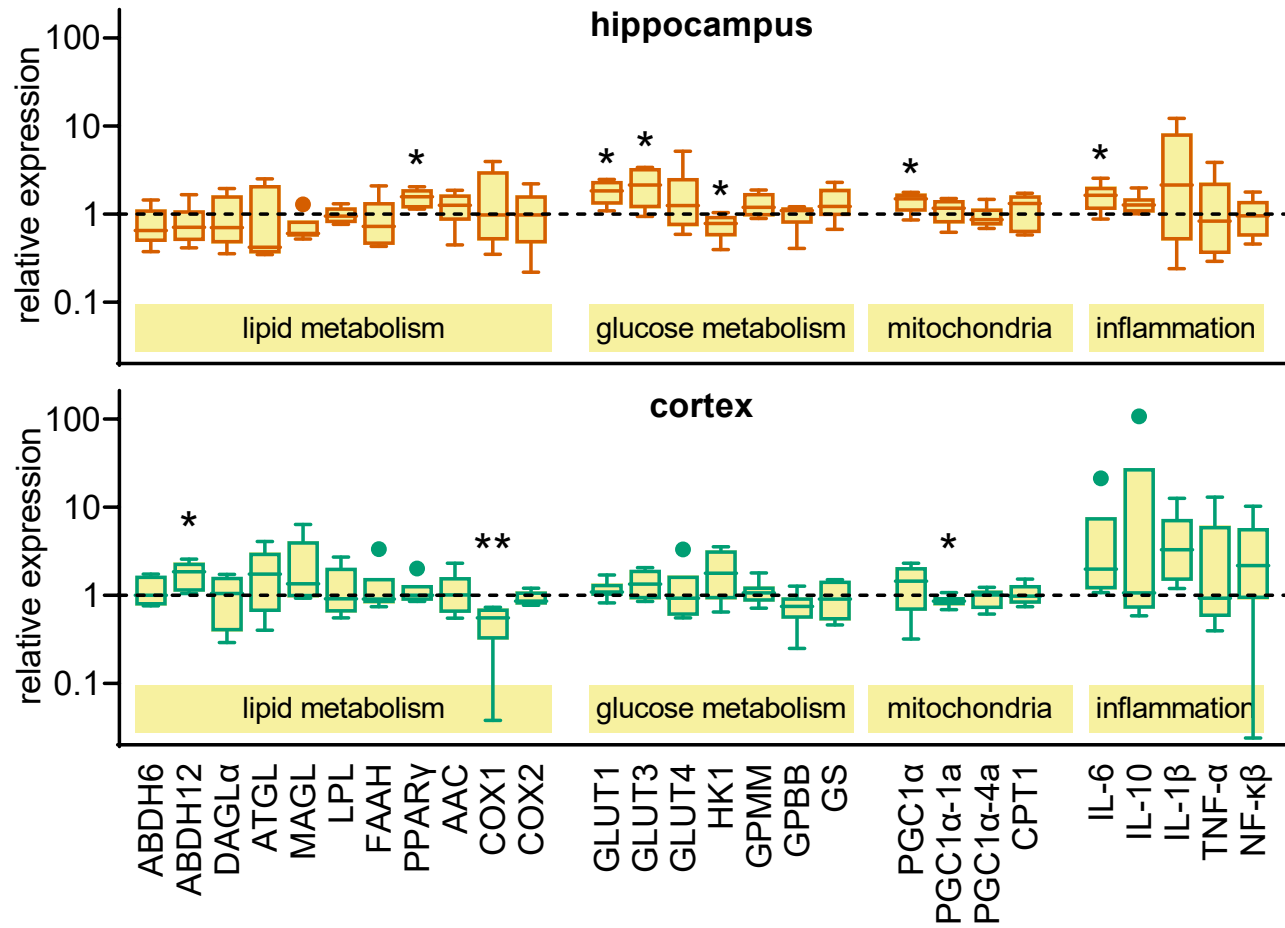

Supplement: mmc1.pdf [file mmc1.pdf]
